# Supplementary material for: Immunogenicity, safety and reactogenicity of a heterogeneous booster following the CoronaVac inactivated SARS-CoV-2 vaccine in patients with SLE: a case series
Source: PubMed Central journal article supplement — RMD Open. 2021 Dec 3;7(3):e002019. doi: 10.1136/rmdopen-2021-002019 (PMC8646968; doi:10.1136/rmdopen-2021-002019), 2021-12-03

**Supplemental Figure 1: Reactogenicity of the SAR-CoV-2 vaccine boosters within 7 days after vaccination**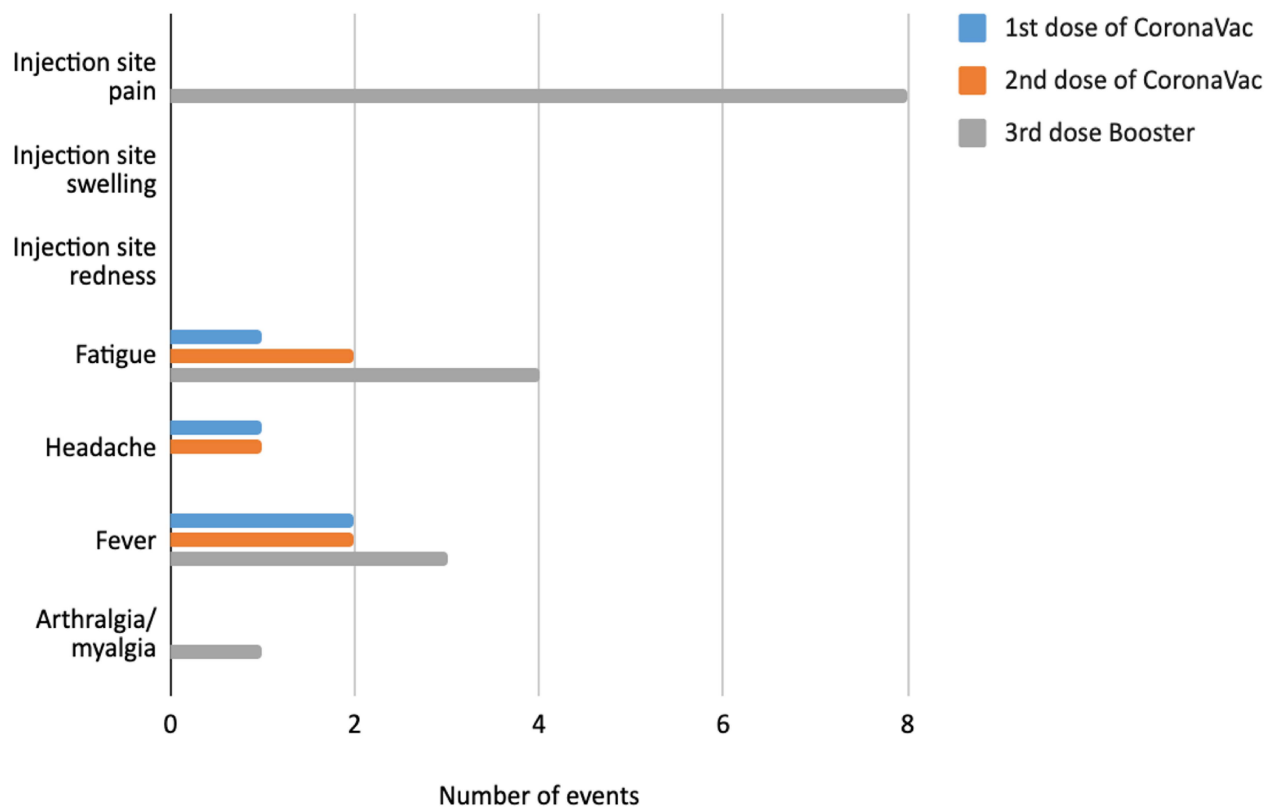

Supplement: rmdopen-2021-002019supp001.pdf [file rmdopen-2021-002019supp001.pdf]
